# Supplementary material for: ATM Limits Incorrect End Utilization during Non-Homologous End Joining of Multiple Chromosome Breaks
Source: PubMed Central journal article supplement (PMC2973825; doi:10.1371/journal.pgen.1001194), 2010-11-04

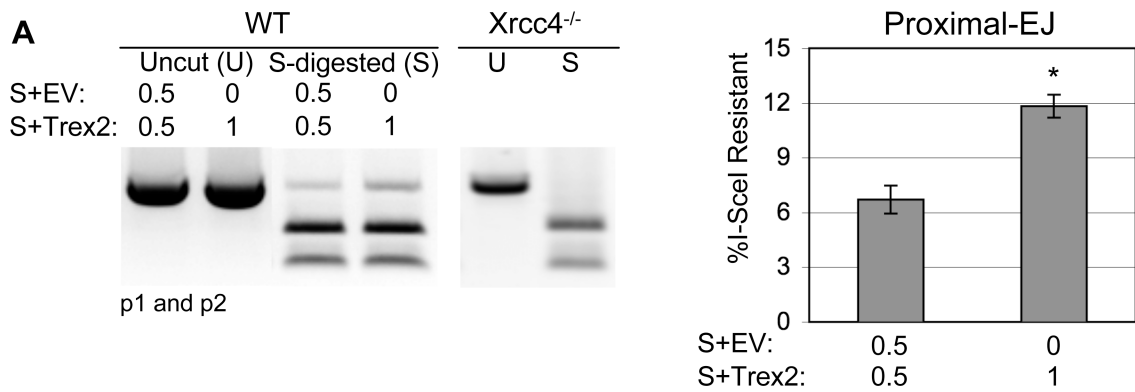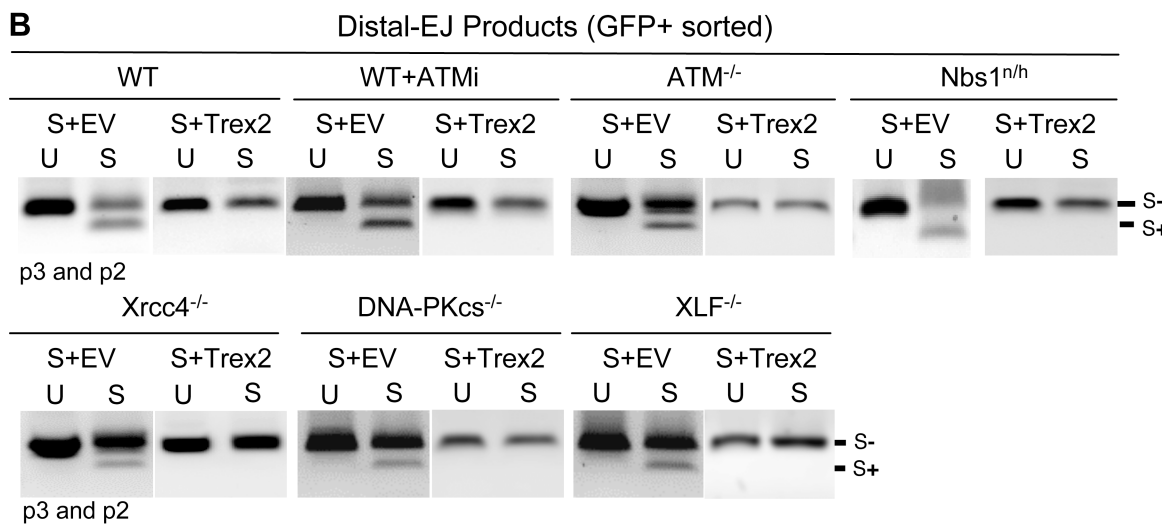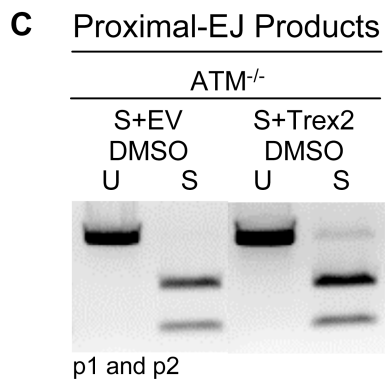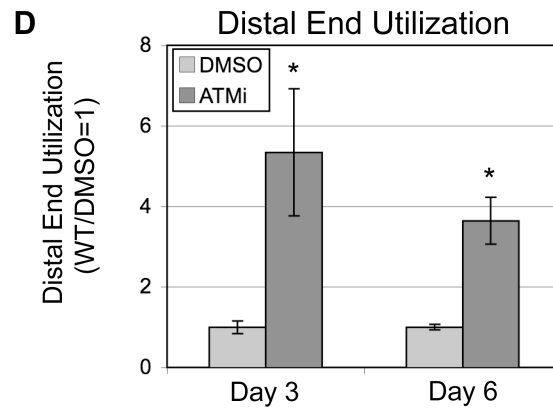

Supplement: pgen.1001194.s001.pdf [file pgen.1001194.s001.pdf]
