# Supplementary material for: ATM Limits Incorrect End Utilization during Non-Homologous End Joining of Multiple Chromosome Breaks
Source: PubMed Central journal article supplement (PMC2973825; doi:10.1371/journal.pgen.1001194), 2010-11-04
Supplement: pgen.1001194.s003.pdf [file pgen.1001194.s003.pdf]

| <b>TABLE S1. Breakpoint Junction Sequences</b>                                                   |                       |              |                  |                          |                           |                                  |                            |                               |
|--------------------------------------------------------------------------------------------------|-----------------------|--------------|------------------|--------------------------|---------------------------|----------------------------------|----------------------------|-------------------------------|
| <b>I-SceI Site(CAPS)</b>                                                                         | <b>micro-homology</b> | <b>WT</b>    | <b>WT + ATMi</b> | <b>ATM<sup>-/-</sup></b> | <b>Nbs1<sup>n/h</sup></b> | <b>Nbs1<sup>n/h</sup> + ATMi</b> | <b>Xrcc4<sup>-/-</sup></b> | <b>DNA PKcs<sup>-/-</sup></b> |
| caaagaattcTAGGGATAA/CAGGGTAATggatccaccg                                                          |                       |              |                  |                          |                           |                                  |                            |                               |
| <b>insertions / deletions</b>                                                                    |                       |              |                  |                          |                           |                                  |                            |                               |
| <b>insertion+1</b>                                                                               |                       | <b>0/30</b>  | <b>0/30</b>      | <b>9/30</b>              | <b>12/30</b>              | <b>1/30</b>                      | <b>0/30</b>                | <b>11/30</b>                  |
| TAGGGATAAACAGGGTAAT. <b>1nt. insertion</b>                                                       | 2                     |              |                  | 9                        | 12                        | 1                                |                            | 11                            |
| <b>deletion 1-5nt.</b>                                                                           |                       | <b>17/30</b> | <b>0/30</b>      | <b>1/30</b>              | <b>17/30</b>              | <b>0/30</b>                      | <b>0/30</b>                | <b>16/30</b>                  |
| TAGGG...CAGGGTAAT 4nt. deletion                                                                  | 0                     | 16           |                  | 1                        |                           |                                  |                            |                               |
| TAGG...CAGGGTAAT 5nt. deletion                                                                   | 0                     |              |                  |                          | 2                         |                                  |                            |                               |
| TAGGG <u>A</u> ...GGGTAAT 5nt. deletion                                                          | 1                     | 1            |                  |                          | 15                        |                                  |                            | 16                            |
| <b>deletion 6-9nt.</b>                                                                           |                       | <b>12/30</b> | <b>18/30</b>     | <b>3/30</b>              | <b>0/30</b>               | <b>0/30</b>                      | <b>0/30</b>                | <b>3/30</b>                   |
| TAG...CAGGGTAAT 6nt. deletion                                                                    | 0                     |              | 1                |                          |                           |                                  |                            |                               |
| TAGGG <u>G</u> ...GGTAAT 7nt. deletion                                                           | 1                     |              | 2                |                          |                           |                                  |                            |                               |
| T <u>A</u> ...CAGGGTAAT 7nt. deletion                                                            | 1                     |              | 1                |                          |                           |                                  |                            |                               |
| T <u>A</u> GGG...TAAT 9nt. deletion                                                              | 4                     | 11           | 5                | 1                        |                           |                                  |                            | 1                             |
| caaagaattc...CAGGGTAAT 9nt. deletion                                                             | 0                     | 1            | 8                | 1                        |                           |                                  |                            | 2                             |
| TAGG...ATAAT 9nt. deletion, <b>1nt. insertion</b>                                                | 0                     |              | 1                |                          |                           |                                  |                            |                               |
| TAGGG...T <u>G</u> AT 9nt. deletion, <b>1nt. substitution (G)</b>                                | 4                     |              |                  | 1                        |                           |                                  |                            |                               |
| <b>deletion 10-19nt.</b>                                                                         |                       | <b>1/30</b>  | <b>3/30</b>      | <b>13/30</b>             | <b>1/30</b>               | <b>29/30</b>                     | <b>0/30</b>                | <b>0/30</b>                   |
| caaagaatt... <u>C</u> AGGGTAAT 10nt. deletion                                                    | 1                     | 1            |                  |                          |                           |                                  |                            |                               |
| TAGGG...TAT 10nt. deletion, <b>1nt. insertion</b>                                                | 0                     |              | 3                |                          |                           |                                  |                            |                               |
| caaa...ATAACAGGGTAAT 11nt. deletion                                                              | 0                     |              |                  |                          | 1                         |                                  |                            |                               |
| caaaga... <u>A</u> GGGTAAT 14nt. deletion                                                        | 1                     |              |                  |                          |                           | 25                               |                            |                               |
| ...ACAGGGTAAT 19nt. deletion                                                                     | 0                     |              |                  | 1                        |                           |                                  |                            |                               |
| <u>C</u> AGGGTAATggatccaccg 19nt. deletion                                                       | 2                     |              |                  | 12                       |                           | 4                                |                            |                               |
| <b>deletion ≥20nt.</b>                                                                           |                       | <b>0/30</b>  | <b>9/30</b>      | <b>4/30</b>              | <b>0/30</b>               | <b>0/30</b>                      | <b>30/30</b>               | <b>0/30</b>                   |
| caaag... <u>A</u> ATggatccaccg 20nt. deletion                                                    | 3                     |              |                  |                          |                           |                                  | 6                          |                               |
| caaaga... <u>a</u> tccaccg 24nt. deletion                                                        | 2                     |              |                  | 4                        |                           |                                  |                            |                               |
| ... <u>a</u> tccaccg 37nt. deletion                                                              | 2                     |              |                  |                          |                           |                                  | 2                          |                               |
| tcctgggc... <u>A</u> ACAGGGTAAT 52nt. deletion                                                   | 3                     |              | 9                |                          |                           |                                  |                            |                               |
| <u>g</u> tgctg...tctcatctttggcaaaga...(I-SceI site)... <u>a</u> tggtgagca 12nt. del., 41nt. del. | 6,2                   |              |                  |                          |                           |                                  | 19                         |                               |
| ggttatttg... <u>a</u> gcatggtga 61nt. deletion, <b>1nt. substitution (g)</b>                     | 0                     |              |                  |                          |                           |                                  | 1                          |                               |
| cagctcctgg... <u>c</u> caccatggt 79nt. deletion                                                  | 1                     |              |                  |                          |                           |                                  | 2                          |                               |
